# Supplementary material for: Nitrogen-enriched porous carbon nanorods templated by cellulose nanocrystals as high performance supercapacitor electrodes
Source: Royal Society of Chemistry journal article supplement (doi:10.1039/c5ta07252b), 2015-01-01
Supplement: c5ta07252b1.pdf [file c5ta07252b1.pdf]

## Electronic Supplementary Information (ESI)

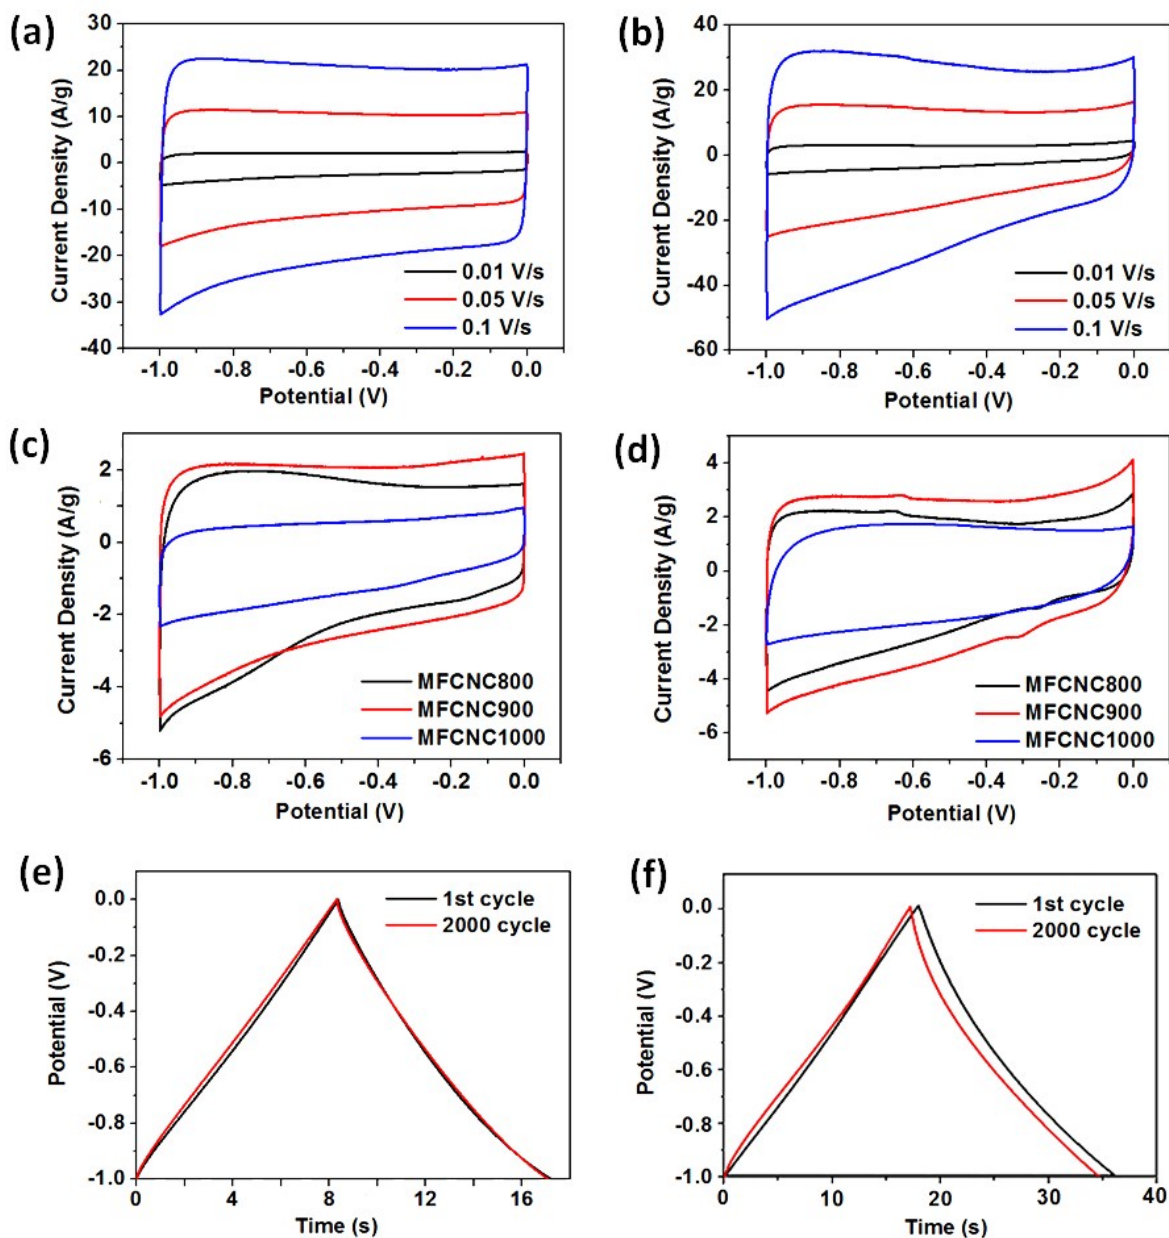

**Fig. S1** (a) Cyclic voltammetry curves for MFCNC900 with the scan rate of 0.01 V/s, 0.05 V/s and 0.1 V/s using 2M KCl as the electrolyte; (b) Cyclic voltammetry curves for MFCNC900 with the scan rate of 0.01 V/s, 0.05 V/s and 0.1 V/s using 6M KOH as the electrolyte; (c) Cyclic voltammetry curves for MFCNC800 MFCNC900 MFCNC1000 with the same scan rate of 0.01 V/s using 2M KCl as the electrolyte; (d) Cyclic voltammetry curves for MFCNC800 MFCNC900 MFCNC1000 with the same scan rate of 0.01 V/s using 6M KOH as the electrolyte (e) Stability test in 2M KCl electrolyte for MFCNC900 at 20 A/g charge/discharge rate for 2000 cycles and (f) Stability test in 6M KOH electrolyte for MFCNC900 at a 20 A/g charge/discharge rate over 2000 cycles.

10

20

15

**Table S1** Summary of capacitance performance of MFCNC 800 MFCNC900 MFCNC1000 in neutral, alkaline and acidic electrolytes.

Capacitance in various electrolytes (F/g)

| Scan Rate (V/s) | 2M KCl    |           |            | 6M KOH    |           |            | 1M H <sub>2</sub> SO <sub>4</sub> |           |            |
|-----------------|-----------|-----------|------------|-----------|-----------|------------|-----------------------------------|-----------|------------|
|                 | MFCNC 800 | MFCNC 900 | MFCNC 1000 | MFCNC 800 | MFCNC 900 | MFCNC 1000 | MFCNC 800                         | MFCNC 900 | MFCNC 1000 |
| 0.01            | 214.2     | 237.2     | 96.5       | 213.3     | 289.5     | 160.4      | 287.3                             | 328.5     | 177.5      |
| 0.05            | 199.4     | 202.4     | 81.8       | 189.4     | 258.4     | 122.2      | 240.4                             | 286.1     | 134.7      |
| 0.1             | 179.5     | 192.4     | 76.9       | 179.0     | 255.5     | 101.0      | 221.0                             | 272.0     | 120.7      |
| 0.2             | 160.9     | 183.0     | 72.8       | 169.3     | 243.3     | 79.8       | 203.8                             | 261.2     | 110.6      |
| 0.4             | 150.0     | 176.0     | 68.8       | 158.8     | 231.0     | 61.6       | 182.3                             | 250.9     | 98.6       |

5

10
